# Supplementary material for: Prospective Randomized Controlled Trial to Evaluate Effectiveness of Registered Dietitian–Led Diabetes Management on Glycemic and Diet Control in a Primary Care Setting in Taiwan
Source: PubMed Central journal article supplement — Diabetes Care. 2009 Nov 12;33(2):233–9. doi: 10.2337/dc09-1092 (PMC2809255; doi:10.2337/dc09-1092), 2009-11-12
Supplement: supp_dc09-1092_dc09-1092_online_appendix.pdf [file supp_dc09-1092_dc09-1092_online_appendix.pdf]

**Supplemental Table 1- Changes in medication use in type 2 diabetic patients with baseline HbA1c  $\geq$  7% after receiving 12 month intervention or usual care (control).<sup>†</sup>**

|                                   | Baseline               |                   |       | At 12 month follow-up  |                   |       |
|-----------------------------------|------------------------|-------------------|-------|------------------------|-------------------|-------|
|                                   | Intervention<br>(n=56) | Control<br>(n=60) | p     | Intervention<br>(n=56) | Control<br>(n=60) | p     |
| <b>Glucose-lowering treatment</b> |                        |                   |       |                        |                   |       |
| Sulfonylurea                      | 54(96.4)               | 57(95.0)          | 1.000 | 54(96.4)               | 60(100.0)         | 0.231 |
| Bigrunide                         | 45(80.4)               | 50(83.3)          | 0.677 | 45(80.4)               | 49(81.7)          | 0.857 |
| Thiazolidinedione                 | 7(12.5)                | 14(23.3)          | 0.130 | 8(14.3)                | 15(25.0)          | 0.148 |
| Other oral hypoglycemia agent     | 0(0.0)                 | 2(3.3)            | 0.496 | 1(1.8)                 | 2(3.3)            | 1.000 |
| <b>Lipid-lowing treatment</b>     |                        |                   |       |                        |                   |       |
| Gemfibozil                        | 2(3.6)                 | 0(0.0)            | 0.231 | 1(1.8)                 | 3(5.0)            | 0.619 |
| Statins                           | 21(37.5)               | 13(21.7)          | 0.061 | 20(35.7)               | 20(33.3)          | 0.787 |
| Fibrate                           | 0(0.0)                 | 1(1.7)            | 1.000 | -                      | -                 | -     |
| <b>Antihypertensive treatment</b> |                        |                   |       |                        |                   |       |
| Diuretics                         | 1(1.8)                 | 2(3.3)            | 1.000 | 2(3.6)                 | 1(1.7)            | 0.609 |
| Beta-blocker                      | 0(0.0)                 | 2(3.3)            | 0.496 | 2(3.6)                 | 5(8.3)            | 0.441 |
| Alpha-blocker                     | 1(1.8)                 | 1(1.7)            | 1.000 | 0(0.0)                 | 1(1.7)            | 1.000 |
| Calcium-channel blocker           | 17(30.4)               | 20(33.3)          | 0.731 | 20(35.7)               | 24(40.0)          | 0.635 |
| ACE inhibitor                     | 7(12.5)                | 9(15.0)           | 0.696 | 7(12.5)                | 10(16.7)          | 0.526 |
| ARB                               | 4(7.1)                 | 7(11.7)           | 0.531 | 5(8.9)                 | 11(18.3)          | 0.182 |
| <b>Aspirins</b>                   | 4(7.1)                 | 8(13.3)           | 0.365 | 8(14.3)                | 13(21.7)          | 0.342 |

<sup>†</sup> Data are presented as n (%).  $\chi^2$  test or Fisher exact test (if n<5) was used to test differences between the intervention and control subjects at baseline or at 1 year follow up. A p<0.05 is considered significantly different.
